# Supplementary material for: Iron-oxide nanoparticle release from jellyfish-based hydrogels for agricultural fertilization
Source: Royal Society of Chemistry journal article supplement (doi:10.1039/d5en00505a), 2025-12-01
Supplement: d5en00505a1.pdf [file d5en00505a1.pdf]

Supporting Information

# **Iron-Oxide Nanoparticle Release from Jellyfish-Based Hydrogels for Agricultural Fertilization**

*Environmental Science: Nano*

*Guy Avrahami<sup>1</sup>, Yinon Yecheskel<sup>1</sup>, Hadi Balous<sup>2,3</sup>, Shachar Richter<sup>2,3</sup>,  
Ines Zucker<sup>\*1</sup>*

*<sup>1</sup> School of Mechanical Engineering, Faculty of Engineering, Tel Aviv University, Tel Aviv 69978, Israel*

*<sup>2</sup> Department of Materials Science and Engineering, Faculty of Engineering, Tel Aviv University, Tel Aviv 69978, Israel*

*<sup>3</sup> University Center for Nano Science and Nanotechnology*

*\* Corresponding author; Address: Tel Aviv University, Tel Aviv 69978, Israel; Tel: (+972) 73-3804581; email:  
[ineszucker@tauex.tau.ac.il](mailto:ineszucker@tauex.tau.ac.il)*

**Table S1.** Soil properties as measured by Ben Mordechay et al., 2023 <sup>1</sup>. Soils were sampled from lysimeters irrigated for 20 years with tap water.

| Location                            | Ein Hashlosa | Saad        | Nir Oz      |
|-------------------------------------|--------------|-------------|-------------|
| Sand (%)                            | 47           | 25          | 82          |
| Silt (%)                            | 40           | 48          | 14          |
| Clay (%)                            | 13           | 27          | 4           |
| Soil organic matter (%)             | 2.64 ± 0.01  | 2.27 ± 0.07 | 1.04 ± 0.05 |
| CaCO <sub>3</sub> (%)               | 8            | 16          | 4           |
| Bulk density (g/cm <sup>3</sup> )   | 1.27 ± 0.01  | 1.24 ± 0.01 | 1.38 ± 0.01 |
| Cation exchange capacity (meq/100g) | 16           | 21          | 11          |
| pH                                  | 7.5          | 7.6         | 7.5         |

**Table S2** Zeta potential of Fe<sub>3</sub>O<sub>4</sub> and Fe(OH)<sub>3</sub> NPs before and after release from JF-based hydrogel beads.

| NP type                           | Zeta Potential (mV) |
|-----------------------------------|---------------------|
| Fe <sub>3</sub> O <sub>4</sub>    | -9.2 ± 2.4          |
| Fe(OH) <sub>3</sub>               | -11.1 ± 0.3         |
| Fe(OH) <sub>3</sub> after release | -19.3 ± 1.1         |

**Table S3.** Diameter of iron-containing jellyfish-based hydrogel beads (Fe(OH)<sub>3</sub>@JF).

| Fe(OH) <sub>3</sub> @JF bead type                                             | Diameter (mm) |
|-------------------------------------------------------------------------------|---------------|
| After formulation                                                             | 4.9 ± 0.5     |
| 20 days in Nir Oz soil suspension                                             | 4.1 ± 0.2     |
| 20 days in Nir Oz soil suspension that was sterilized in 160 °C               | 4.2 ± 0.3     |
| 20 days in Nir Oz soil suspension that was submerged in 1 M CaCl <sub>2</sub> | 5.1 ± 0.7     |

**Table S4.** Cation content in different soil suspensions.

| Cation Type           | Ein Hashlosa | Saad        | Nir Oz      |
|-----------------------|--------------|-------------|-------------|
| Na <sup>+</sup> (mM)  | 0.67 ± 0.75  | 1.14 ± 0.03 | 1.25 ± 0.26 |
| K <sup>+</sup> (mM)   | 0.17 ± 0.02  | 0.33 ± 0.04 | 1.79 ± 0.23 |
| Mg <sup>+2</sup> (mM) | 0.57 ± 0.01  | 0.41 ± 0.01 | 0.36 ± 0.01 |
| Ca <sup>+2</sup> (mM) | 1.95 ± 0.01  | 2.06 ± 0.02 | 2.88 ± 0.01 |

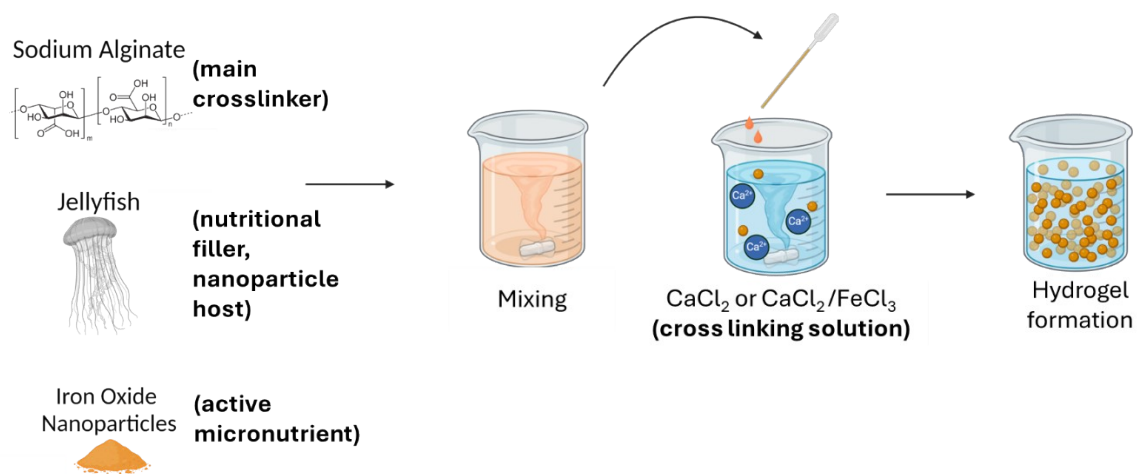

**Figure S1.** Schematic illustration of the synthesis procedure and the function of each component (in bold).

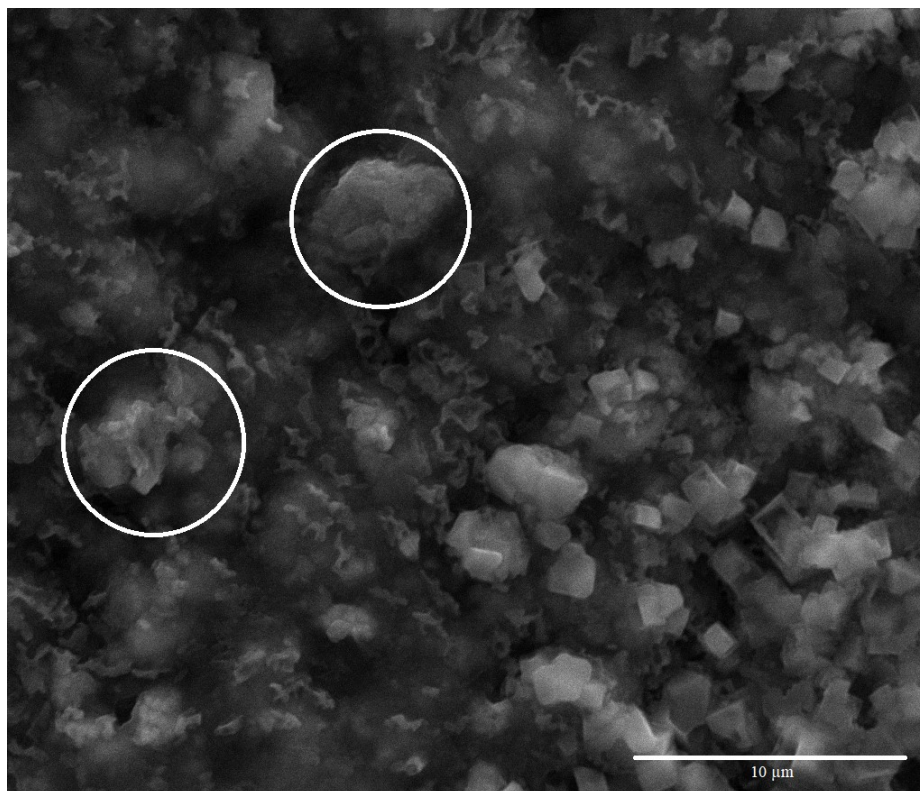

**Figure S2.** Environmental scanning electron micrograph (ESEM) of a dried  $\text{Fe}(\text{OH})_3@JF$  bead cross section. The circled area highlights aggregates of iron nanoparticles (NPs).

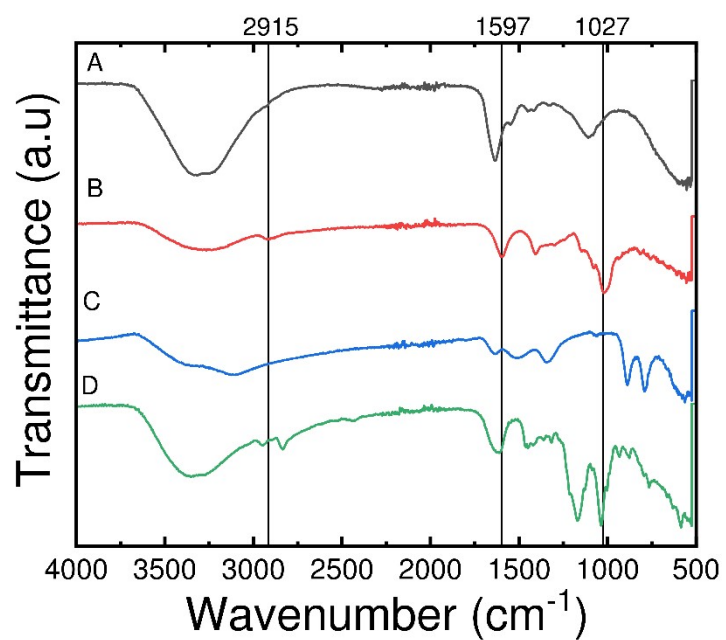

**Figure S3.** FTIR spectra of (A) Jellyfish, (B) Sodium alginate, (C)  $\text{Fe}(\text{OH})_3$  nanoparticles, and (D)  $\text{Fe}(\text{OH})_3$  nanoparticles after release from hydrogels.

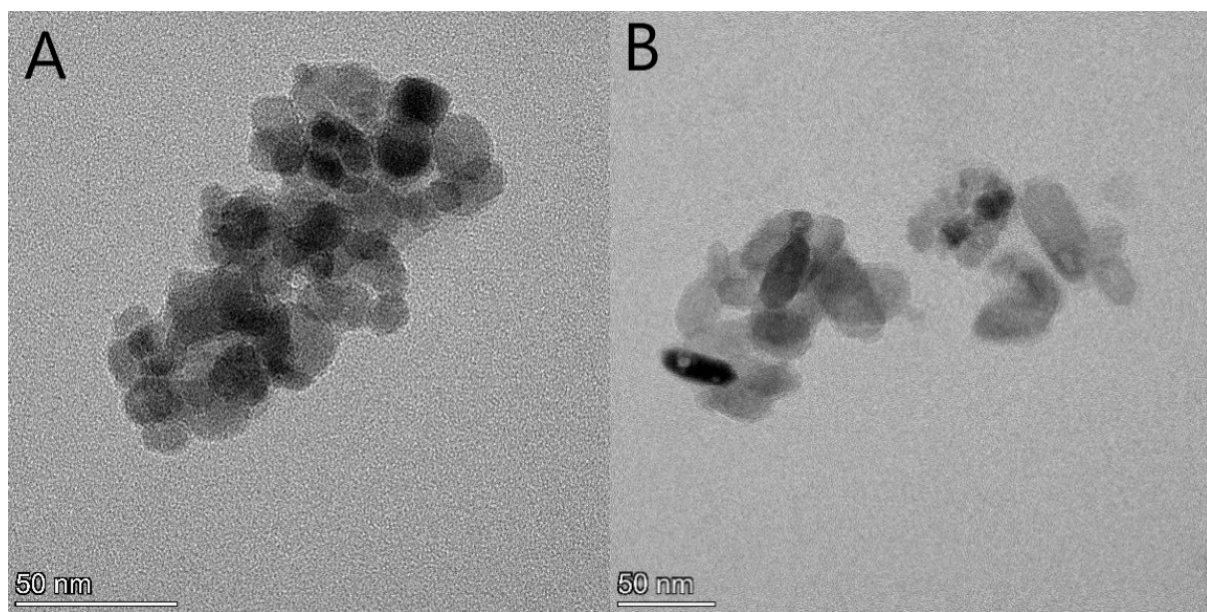

**Figure S4.** Transmission electron microscope (TEM) images of (A)  $\text{Fe}_3\text{O}_4$  NPs and (B)  $\text{Fe}(\text{OH})_3$  NPs.

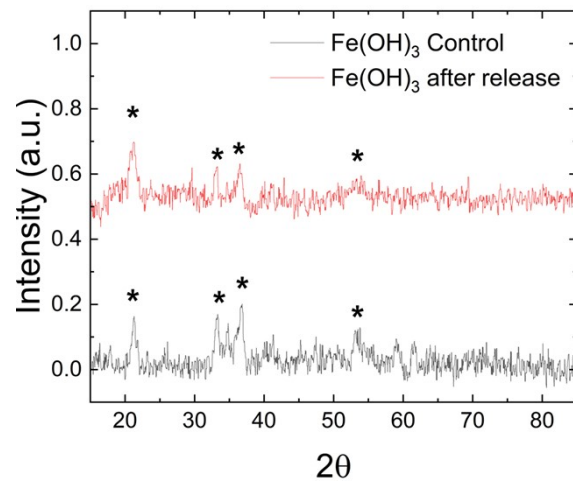

**Figure S5.** X-ray diffraction (XRD) spectra of  $\text{Fe}(\text{OH})_3$  nanoparticles prior to (control) and following release from the hydrogel into soil solution. The asterisks represent expected iron hydroxide peaks present on both samples.

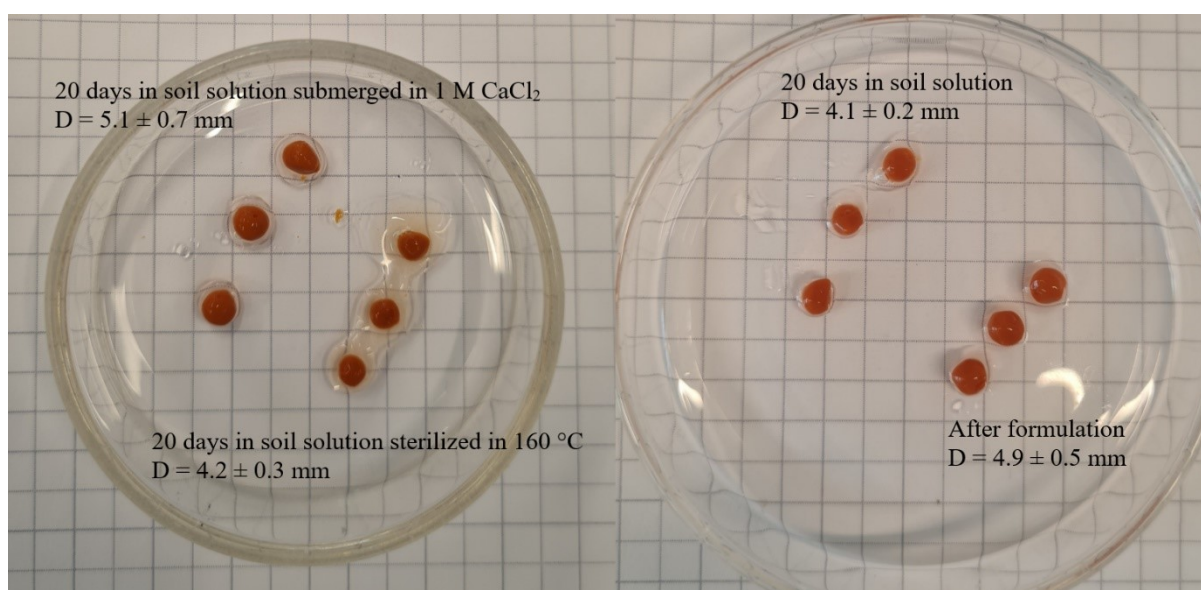

**Figure S6.** Images of iron-containing jellyfish-based hydrogel beads ( $\text{Fe}(\text{OH})_3@JF$ ) after formulation, after 20 days in soil suspension prepared from Nir Oz soil, after 20 days in soil suspension prepared from Nir Oz soil that was sterilized in 160 °C, and after 20 days in soil suspension prepared from Nir Oz soil that was submerged in 1 M  $\text{CaCl}_2$ .



## References

- 1 E. Ben Mordehay, M. Shenker, J. Tarchitzky, V. Mordehay, Y. Elisar, Y. Maor, J. J. Ortega-Calvo, D. Hennecke, T. Polubesova and B. Chefetz, *Soil and Environmental Health*, DOI:10.1016/j.seh.2023.100036.
